# Supplementary material for: Spectral characterisation of hydrothermal alteration associated with sediment-hosted Cu–Ag mineralisation in the central European Kupferschiefer
Source: Copernicus journal article supplement (doi:10.5194/se-14-463-2023), 2023-04-27
Supplement: Supplementary file 1 [file se-14-463-2023-supplement.zip]

Archive with 2 entries (2 files):
- se-14-463-2023-supplement-title-page.pdf
- Supplement_table.xlsx
