# Supplementary material for: Spectral characterisation of hydrothermal alteration associated with sediment-hosted Cu–Ag mineralisation in the central European Kupferschiefer
Source: Copernicus journal article supplement (doi:10.5194/se-14-463-2023), 2023-04-27
Supplement: Supplementary file 1 [file se-14-463-2023-supplement.zip › se-14-463-2023-supplement-title-page.pdf]

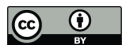

*Supplement of*

## **Spectral characterisation of hydrothermal alteration associated with sediment-hosted Cu–Ag mineralisation in the central European Kupferschiefer**

**Léa Géring et al.**

*Correspondence to:* Léa Géring (lea.gering@hotmail.fr)

- se-14-463-2023-supplement-title-page.pdf
- Supplement\_table.xlsx

The copyright of individual parts of the supplement might differ from the article licence.
