# Supplementary material for: Spectral characterisation of hydrothermal alteration associated with sediment-hosted Cu–Ag mineralisation in the central European Kupferschiefer
Source: Copernicus journal article supplement (doi:10.5194/se-14-463-2023), 2023-04-27
Supplement: Supplementary file 1 [file se-14-463-2023-supplement.zip › Supplement_table.xlsx]

## Sheet: Feuil2
	Depth		Litho*	Grade	Quartz						Clays and Micas			Carbonates								Sluphates			Iron
ID	From (m)	To (m)		Cu (%)	F4500 depth	F4500 (λ)	F4500 (band ratio)	F8200 depth	F8200 (λ)	F8200 (band ratio)	KI	F2200 depth	F2200 (λ)	F11300 depth	F11300 (λ)	F2330 depth	F2330 (λ)	F3700 depth	F3700 (λ)	F3900 depth	F3900 (λ)	AnI (band ratio)	F1750 depth	F1750 (λ)	Fe2+ index	Fe3+ index
131	976.75	976.85	z1K	0.0654	0.0182241	4452.5	0.0279386	8518.43	0.815602	1.10971		0.0221368	2208.75	0.413222	2326.8	0.137742	3660.13	0.110657	3961.6	0.187963	11213.2	1.19361	0.0338962	1746.49	1.01773	1.01665
131	976.85	976.95	z1K	0.0654	0.0303107	4451.65	0.0181008	8498.97	0.75903	1.1119	0.985614	0.0174368	2204.1	0.512882	2326.86	0.1812	3657.51	0.133512	3967.44	0.176727	11210.6	1.17185	0.0338769	1745.9	1.05243	1.02313
131	976.95	977.05	z1K	0.0654	0.0293562	4451.62	0.0235944	8534.93	0.784169	1.16226		0.00761419	2212.44	0.540794	2326.86	0.180066	3655.19	0.132002	3966.56	0.168477	11203	1.24715	0.0366021	1745.33	1.06944	1.02069
131	977.05	977.15	z1K	0.0654	0.0326392	4450.71	0.0172064	8523.91	0.753969	1.13224		0.0223634	2208.45	0.55301	2327.24	0.186596	3652.27	0.130047	3967.57	0.177638	11207.7	1.20419	0.0364118	1745.59	1.08349	1.0189
131	977.15	977.25	z1K	0.0654	0.0351425	4450.97	0.0179233	8534.29	0.760997	1.15788		0.0171103	2201.66	0.562483	2327.11	0.201688	3652.06	0.139331	3969.54	0.166763	11205.9	1.22056	0.0380579	1745.45	1.09341	1.02111
131	977.25	977.35	z1K	0.0654	0.0332406	4451.41	0.0364316	8558.64	0.779582	1.242		0.0273092	2196.89	0.55498	2327.06	0.185602	3652.56	0.126566	3969.03	0.159352	11206.9	1.29649	0.0346796	1745.5	1.09845	1.02213
131	977.35	977.45	z1K	0.0654	0.0290317	4451.46	0.0261697	8425.61	0.791085	1.1132		0.00659875	2214.32	0.542908	2327.07	0.161996	3652.91	0.121231	3962.96	0.186521	11212.7	1.11167	0.0350145	1745.61	1.08634	1.0169
131	977.45	977.55	z1K	0.0654	0.0192697	4452.23	0.0151711	8336.03	0.812481	1.03595		0.0218156	2209.06	0.475884	2326.73	0.119909	3656.18	0.10391	3953.76	0.21145	11212.7	1.0519	0.0389819	1745.75	1.04474	1.0112
131	977.55	977.65	z1K	0.0654	0.0188064	4451.53	0.0142912	8342.45	0.803795	1.01568		0.030929	2208.44	0.44909	2326.57	0.12889	3660.7	0.110738	3957.02	0.220922	11215.8	1.07027	0.0320929	1745.93	1.02908	1.01531
131	977.65	977.75	z1K	0.0654	0.0192396	4451.95	0.02072	8346.26	0.802609	1.02404		0.0350153	2208.56	0.38076	2326.56	0.1243	3663.04	0.107173	3957.5	0.309669	11221.6	1.10258	0.0327062	1746.07	1.01617	1.01017
131	977.75	977.85	z1K	0.0654	0.0148693	4452.15	0.0295309	8314.39	0.829866	1.04932		0.0337986	2209.11	0.351846	2326.85	0.113415	3661.92	0.10338	3953.91	0.347131	11220.3	1.15277	0.0434699	1746.45	0.995612	1.00716
131	977.85	977.95	z1K	0.0654	0.0195535	4451.01	0.0346698	8384.7	0.806223	1.1276		0.0156423	2208.41	0.43881	2326.75	0.12493	3659.79	0.104852	3958.68	0.319202	11220	1.1702	0.0416454	1746.22	1.01638	1.01132
131	977.95	978.05	z1K	0.0654	0.0201555	4451.3	0.0244243	8425.29	0.799061	1.12667		0.0323452	2208.49	0.39145	2327.05	0.137804	3663.19	0.112085	3962.94	0.284898	11224.1	1.18388	0.0398403	1746.43	1.02028	1.01265
131	978.05	978.15	z1K	0.0654	0.0146977	4452.7	0.0280067	8291.33	0.811639	1.08314		0.0238561	2206.6	0.357274	2326.74	0.110228	3661.77	0.0977429	3954.39	0.293305	11231.3	1.12263	0.0346923	1746.27	1.00877	1.00699
131	978.15	978.25	z1K	0.988	0.0193256	4451.07	0.0286459	8292.22	0.795663	1.09268		0.0124903	2208.11	0.413677	2326.9	0.128791	3659.34	0.107895	3958.61	0.292472	11227.8	1.11505	0.0348407	1746.2	1.01688	1.00934
131	978.25	978.35	z1K	0.988	0.00975971	4457.18	0.0310031	8288.62	0.852166	1.10331		0.0228594	2209.66	0.235021	2326.48	0.0902797	3667.55	0.0845556	3954.74	0.264517	11252.7	1.08902	0.0324629	1747.27	0.981813	1.00317
131	978.35	978.45	z1K	0.988	0.010783	4454.47	0.0336685	8354.61	0.873673	1.1539		0.0402572	2209.3	0.0983284	2327.65	0.0907324	3680.53	0.0948023	3957.92	0.165017	11257.9	1.13522	0.0335358	1747.53	0.970636	1.00541
131	978.45	978.55	z1K	1.65	0.0116454	4452.95	0.0334133	8374.06	0.866781	1.16332		0.0417156	2208.58	0.105112	2328.32	0.0965249	3676.19	0.097411	3958.08	0.176507	11245.4	1.16575	0.0349195	1747.74	0.970136	1.00573
131	978.55	978.65	z1K	1.65	0.0114647	4453.87	0.0689405	8300.42	0.873063	1.26633		0.0384802	2209.18	0.0963428	2327.86	0.0926596	3676.59	0.0957694	3956.6	0.19125	11235.6	1.15343	0.0346714	1746.66	0.96756	1.00127
131	978.65	978.75	z1K	1.65	0.00999315	4454.9	0.0388148	8407.11	0.895781	1.20005		0.0459929	2208.02	0.0813324	2328.26	0.0800985	3683.47	0.0875428	3956.38	0.136112	11261.3	1.17048	0.0340198	1747.78	0.974013	1.00445
131	978.75	978.85	z1K	2.31	0.00799061	4455.31	0.0380707	8286.29	0.894662	1.16633		0.0634754	2206.69	0.0845759	2329.51	0.0702076	3688.89	0.0794927	3956.09	0.110391	11279	1.03133	0.0356057	1749.31	0.973351	1.00663
131	978.85	978.95	z1K	2.31	0.00652312	4457.27	0.0412182	8252.78	0.899937	1.17539		0.070065	2206.76	0.0719781	2331.06	0.0637842	3697.87	0.0767722	3956.62	0.0649302	11289.7	0.955447	0.0335928	1749.75	0.97395	1.00874
131	978.95	979.05	z1K	2.31	0.00784637	4455.6	0.0409463	8256.59	0.883038	1.21013		0.0775487	2205.9	0.08492	2331.17	0.0745535	3692.97	0.0835932	3956.62	0.0792105	11282.2	0.985248	0.0352174	1749.3	0.978796	1.01968
131	979.05	979.15	z1K	2.51	0.00627002	4456.78	0.0344155	8244.86	0.906518	1.1389	0.993696	0.0683223	2206.32	0.066044	2331.96	0.0602101	3699.53	0.0758528	3956.41	0.0482066	11283.5	0.96544	0.0331979	1749.74	0.970017	0.999747
131	979.15	979.25	z1K	2.51	0.00527728	4461.45	0.0330964	8235.86	0.915925	1.14405		0.0611801	2206.44	0.0633262	2332.06	0.0506014	3697.61	0.0624587	3957.9	0.0447465	11286.5	0.945301	0.0299173	1749.35	0.975711	0.996443
131	979.25	979.35	z1K	1.99	0.0059857	4458.29	0.0320328	8264.82	0.906173	1.13917		0.0711954	2206.81	0.0716985	2331.57	0.0580682	3694.64	0.0686629	3956.05	0.047084	11287.9	0.984274	0.0311639	1749.27	0.979694	0.99805
131	979.35	979.45	z1K	1.99	0.00457758	4461.93	0.0393701	8228.01	0.924688	1.13644		0.0637831	2207.37	0.0466552	2333.62	0.0487812	3708.5	0.0686657	3957.19	0.0275172	11313.7	0.919242	0.0259984	1749.85	0.972714	0.991747
131	979.45	979.55	z1K	1.99	0.00583055	4462.04	0.0481639	8227.93	0.928776	1.21016		0.0737975	2207.2	0.052722	2334.85	0.053773	3705.8	0.0744717	3959.66	0.0292876	11316.3	0.919879	0.0331781	1750.75	0.962873	0.99636
131	979.55	979.65	z1K	1.67	0.00638727	4458.04	0.0472362	8239.42	0.910959	1.17711	0.99403	0.0875727	2207.19	0.0861896	2333.68	0.0591148	3698.07	0.0719779	3957.37	0.076194	11301.4	0.940315	0.0326908	1750.1	0.974706	1.00089
131	979.65	979.75	z1K	1.67	0.00923228	4455.5	0.0541989	8245.88	0.889843	1.14179		0.106415	2207.53	0.145258	2331.22	0.0802944	3684.42	0.0868819	3957.04	0.119427	11265.1	0.998169	0.0244353	1748	0.987058	1.00718
131	979.75	979.85	z1K	2.62	0.007191	4455.95	0.0489402	8247.78	0.906562	1.15914		0.0632015	2209.11	0.061127	2331.88	0.0671474	3694.71	0.0808098	3957.15	0.0760436	11282.5	0.970281	0.0226084	1748.32	0.957874	0.996238
131	979.85	979.95	z1T	4.33	0.0067488	4458.87	0.0429042	8245.91	0.91243	1.17306		0.0664782	2208.67	0.0804218	2331.43	0.0565082	3692.74	0.06412	3958.99	0.068929	11277.7	0.957346	0.0203566	1748.92	0.962904	0.994155
131	979.95	980.05	z1T	2.89	0.00417666	4465.16	0.0319122	8247.15	0.96329	1.22185	0.985259	0.0254213	2211.22	0.0216594	2329.38	0.0322968	3694.9	0.043283	3958.23	0.056619	11270.4	0.909255	0.017011	1749.65	0.925043	0.989478
131	980.05	980.15	z1T	8.71	0.00446112	4470.39	0.021421	8318.95	0.967739	1.17824	0.970366	0.0241787	2210.34	0.0192411	2329.24	0.0296969	3690.53	0.0373875	3956.98	0.0660856	11269	0.960931	0.0224133	1750	0.926542	1.00087
131	980.15	980.25	z1T	3	0.00853375	4465.98	0.0825088	8454.7	1.00416	1.81689		0.0376834	2209.27	0.025536	2328.23	0.0455573	3667.52	0.0231034	3965.39	0.0470444	11275.1	1.00136	0.0263319	1750.16	0.949826	0.993998
131	980.25	980.35	z1Cs	3	0.0200469	4462.7	0.285268	8212.97	0.9743	3.67527		0.146856	2208.72	0.0622093	2328.07	0.0883295	3674.92	0.086702	3962.98	0.0953353	11260.3	0.856748	0.0275841	1747.89	0.964905	1.01147
131	980.35	980.45	z1Cs	3	0.0353677	4471.21	0.328481	8210.67	1.0161	4.22276		0.229719	2206.91	0.0817728	2343.65	0.10811	3673.08	0.10749	3970.42	0.0367339	11295.9	0.857687	0.0300478	1748.22	0.983767	1.00969
131	980.45	980.55	z1Cs	2.89	0.0307918	4465.85	0.315417	8212.53	0.98264	4.08866		0.235357	2207.56	0.107523	2335.05	0.121993	3669.82	0.110812	3970.75	0.0612068	11286.7	0.849521	0.0276771	1748.06	0.994481	1.00403
131	980.55	980.65	z1Cs	2.89	0.0515326	4471.97	0.330849	8210.94	1.01078	4.22043		0.348114	2206.52	0.159806	2342.22	0.12023	3655.53	0.0916286	3980.95	0.0473285	11296.1	0.866975	0.0238492	1748.38	1.01405	1.00313
131	980.65	980.75	z1Cs	2.89	0.073639	4480.24	0.340502	8217.28	1.04904	4.15283		0.383548	2205.53	0.123838	2342.36	0.0751909	3634.32	0.0489788	3986.98	0.0112657	11316.5	0.917423	0.0290946	1748.09	0.990173	1.00027
131	980.75	980.85	z1Cs	2.89	0.0706207	4478.56	0.348634	8221.83	1.0567	4.26267		0.352344	2205.84	0.12019	2346.96	0.0744098	3636.17	0.047393	3987.97	0.0119393	11320.1	0.881586	0.0323449	1747.66	0.987116	0.998891
131	980.85	980.95	z1Cs	2.89	0.0725189	4476.66	0.343648	8223.38	1.07039	4.51184		0.373678	2206.01	0.0778863	2345.07	0.0887917	3641.66	0.0561168	3988.04	0.0136597	11322	0.861082	0.0460804	1747.49	0.99533	1.00125
131	980.95	981.05	z1Cs	1.88	0.0775467	4477.11	0.317655	8222.94	1.0841	4.0829		0.392799	2206.28	0.101032	2346.64	0.089257	3635.98	0.0523391	3990.56	0.0110929	11313.4	0.870302	0.0547283	1747.08	0.991677	0.996367
131	981.05	981.15	z1Cs	1.88	0.0801407	4478.34	0.292925	8219.23	1.08203	3.53786		0.407892	2205.94	0.11211	2347.02	0.0913538	3635.04	0.0604846	3989.11	0.00865329	11283.8	0.90276	0.0597032	1745.92	0.987419	0.997058
131	981.15	981.25	z1Cs	1.88	0.084193	4478.99	0.289227	8227.38	1.08731	3.83446	0.984504	0.433062	2205.51	0.118786	2339.87	0.0969038	3635.97	0.0617175	3992.55	0.0083535	11301.4	0.886862	0.0461054	1746.63	0.990049	0.99167
131	981.25	981.35	z1Cs	1.88	0.0823816	4478.62	0.256324	8229.46	1.09252	3.81516		0.454985	2205.67	0.233571	2347.28	0.131037	3642.74	0.0988866	3992.35	0.00985826	11307.8	0.873459	0.0493068	1746.61	0.990077	0.993284
131	981.35	981.45	z1Cs	1.88	0.0697339	4479.85	0.237772	8225.33	1.05931	3.23348	0.982013	0.436065	2206	0.251294	2347.69	0.221507	3667.24	0.202842	3992.49	0.0167025	11351.8	0.917826	0.0344762	1746.51	0.986089	0.999841
131	981.45	981.55	z1Cs	1.14	0.070247	4478.37	0.250187	8225.45	1.07722	3.44867	0.989387	0.425472	2205.86	0.219845	2347.45	0.151291	3650.52	0.130878	3991.4	0.0119355	11327.7	0.902833	0.0636707	1747.13	0.986707	1.00096
131	981.55	981.65	z1Cs	1.14	0.0590671	4477.06	0.256304	8230.82	1.08196	3.73202	0.986475	0.35871	2206.48	0.0734446	2347.41	0.0781666	3637.97	0.0507791	3988.33	0.0075032	11283.7	0.895961	0.0977929	1749.4	0.980648	0.999677
131	981.65	981.75	z1Cs	1.14	0.0637188	4478.64	0.242247	8228.96	1.08445	3.82793	0.985088	0.341529	2205.67	0.0801669	2344.86	0.0747563	3633.09	0.0533378	3988.51	0.00740097	11297.5	0.874717	0.068554	1747.26	0.971655	0.994943
131	981.75	981.85	z1Cs	1.14	0.0636854	4477.94	0.258279	8232.82	1.10093	4.18618	0.984837	0.349999	2205.91	0.087391	2347.1	0.0846693	3636.93	0.0593289	3989.26	0.00785888	11295.3	0.873026	0.0827338	1748.06	0.974581	0.994631
131	981.85	981.95	z1Cs	1.14	0.0671927	4476.98	0.258375	8234.27	1.09941	3.85506	0.975914	0.363472	2206.28	0.0656873	2346.41	0.0870402	3637.35	0.0621171	3987.39	0.00774892	11280.2	0.886189	0.11397	1748.69	0.97576	0.993502
131	981.95	982.05	z1Cs	1.06	0.0909085	4478.51	0.362219	8226.69	1.11083	4.00081	0.981152	0.412475	2206.44	0.108654	2348.24	0.119462	3639.13	0.0916255	3988.66	0.0117299	11306.4	0.898843	0.0590755	1748.03	0.99161	0.997383
131	982.05	982.15	z1Cs	1.06	0.0999122	4479.61	0.355462	8217.02	1.09182	3.54009	0.987268	0.440607	2205.82			0.128593	3638.48	0.110841	3989.88	0.0121535	11303.4	0.907877	0.0182454	1747.87	0.992917	0.997793
131	982.15	982.25	z1Cs	1.06	0.101061	4479.32	0.345656	8219.41	1.09556	3.67294	0.97896	0.443763	2205.82	0.106285	2330.43	0.130338	3639.44	0.104512	3991.2	0.0118955	11301	0.907268	0.0187302	1747.9	0.993958	0.997078
131	982.25	982.35	z1Cs	1.06	0.0898076	4479.28	0.360918	8222.19	1.1037	3.99484	0.975177	0.411445	2206.25	0.124061	2347.59	0.115283	3637.39	0.086188	3990.85	0.0114903	11303.9	0.89407	0.0275666	1748.06	0.990665	0.997455
131	982.35	982.45	z1Cs	1.06	0.0891571	4479.51	0.352246	8218.84	1.10013	3.68936	0.982647	0.409883	2205.78	0.189762	2349.69	0.114477	3637.05	0.0901515	3990.77	0.0108531	11293	0.914503	0.0193136	1748.1	0.989208	0.99641
131	982.45	982.55	z1Cs	1.06	0.0967479	4479.42	0.360959	8229.83	1.11646	3.83469	0.994156	0.437814	2205.71			0.130041	3638.86	0.102159	3991.84	0.010537	11302.8	0.907358	0.0193158	1747.65	0.992993	0.997847
131	982.55	982.65	z1Cs	1.24	0.103145	4479.39	0.360228	8232.5	1.1288	4.07313	0.983	0.450137	2206.05	0.177138	2348.13	0.12752	3638.85	0.0901041	3993.17	0.0114551	11313.1	0.892345	0.0234062	1747.78	0.99529	0.996372
131	982.65	982.75	z1Cs	1.24	0.0923509	4479.24	0.355852	8230.63	1.10559	3.9285	0.981289	0.409567	2205.93	0.145861	2346.43	0.112501	3636.86	0.0831703	3992.44	0.0105933	11296.2	0.913708	0.0208716	1748.22	0.990444	0.996789
131	982.75	982.85	z1Cs	1.24	0.0953232	4479.13	0.342232	8231.18	1.10753	3.92961	0.980474	0.43407	2205.71	0.135353	2337.15	0.120779	3638.59	0.0901016	3992.82	0.010734	11292	0.924783	0.0191953	1748.03	0.997388	0.998098
131	982.85	982.95	z1Cs	1.24	0.091633	4479	0.337353	8229.8	1.09914	3.85736	0.978464	0.416967	2205.82	0.157104	2348.6	0.12119	3637.5	0.0928566	3992.12	0.0104805	11285.7	0.908658	0.021756	1747.69	0.995417	0.997151
131	982.95	983.05	z1Cs	1.12	0.120048	4479.47	0.440216	8219.06	1.10124	4.7735	0.973922	0.453902	2205.32	0.208561	2346.7	0.133491	3635.17	0.0958194	3992.39	0.0151303	11344.5	0.87394	0.0210081	1747.04	0.988165	0.992594
131	983.05	983.15	z1Cs	1.12	0.0978538	4478.53	0.404614	8204.27	1.08641	3.99872	0.974036	0.429845	2205.23	0.164762	2347.1	0.119423	3639.15	0.0938603	3991.84	0.0155362	11342	0.90362	0.0256922	1746.87	0.989676	0.997915
131	983.15	983.25	z1Cs	1.12	0.0915242	4478.4	0.389595	8209.49	1.08964	4.11474	0.970969	0.416525	2205.27	0.159532	2348.41	0.107185	3637.53	0.0778405	3992.7	0.0135925	11333.6	0.900652	0.0247213	1747.27	0.988193	0.995589
131	983.25	983.35	z1Cs	1.12	0.0873743	4478.34	0.378155	8215.39	1.09267	4.4079	0.975107	0.410851	2205.3	0.173184	2349.07	0.101249	3638.42	0.0758712	3992.25	0.012754	11326.3	0.897959	0.0250808	1747.42	0.988443	0.996278
131	983.35	983.45	z1Cs	1.12	0.0932953	4478.2	0.343103	8210.28	1.10243	4.09118	0.975148	0.456067	2205.12	0.175926	2340.95	0.103435	3637.37	0.0720078	3992.05	0.0124909	11339.6	0.891187	0.0223759	1747.12	0.99261	0.997128
131	983.45	983.55	z1Cs	0.927	0.0941825	4478.34	0.309873	8203.44	1.10799	3.75051	0.972224	0.45481	2204.92			0.10043	3636.49	0.0724962	3991.14	0.0115099	11328.9	0.907626	0.0220395	1747.39	0.993389	0.998582
131	983.55	983.65	z1Cs	0.927	0.0854753	4478.25	0.286992	8213.81	1.1001	3.75467	0.967584	0.419589	2205.35	0.105866	2346.9	0.104612	3637.47	0.0807261	3989.8	0.0124274	11338.7	0.884276	0.0364729	1747.57	0.991691	0.997558
131	983.65	983.75	z1Cs	0.927	0.0872699	4478.74	0.293034	8211.72	1.09052	3.69647	0.970093	0.43097	2205.02	0.100711	2347.93	0.113475	3639.86	0.0942812	3991.17	0.0115306	11327.9	0.891612	0.0266125	1747.38	0.991552	1.00281
131	983.75	983.85	z1Cs	0.927	0.0870253	4478.93	0.300684	8216.76	1.09857	3.95484	0.972794	0.44561	2205.46	0.15493	2347.94	0.157134	3649.2	0.141739	3991.77	0.0130628	11342.9	0.881182	0.0463362	1747.46	0.993272	1.00029
131	983.85	983.95	z1Cs	0.927	0.0883389	4478.92	0.325124	8215.45	1.09274	3.67374	0.973684	0.411492	2205.91	0.126335	2347.52	0.120464	3635.37	0.102905	3989.02	0.0126217	11327.3	0.891888	0.0502397	1747.58	0.986586	0.997426
131	983.95	984.05	z1Cs	0.927	0.0888891	4478.28	0.376376	8202.18	1.07757	3.16077	0.975003	0.445303	2205.16	0.174189	2348.62	0.108207	3634.18	0.0840025	3991.54	0.0107985	11305.5	0.933243	0.0350315	1747.02	0.986539	0.996971
131	984.05	984.15	z1Cs	1.11	0.079392	4477.69	0.38861	8204.06	1.08297	3.68289	0.977535	0.42729	2205.58	0.160746	2347.4	0.110961	3640.92	0.0863381	3993.4	0.0116964	11326.2	0.926487	0.0491237	1747.73	0.990153	0.999496
131	984.15	984.25	z1Cs	1.11	0.0745901	4476.8	0.380764	8214.95	1.07149	3.83657	0.97258	0.421697	2205.51	0.173012	2348.4	0.116076	3646.69	0.0882417	3996.56	0.0139387	11320.5	0.923632	0.042131	1747.59	1.00355	1.00192
131	984.25	984.35	z1Cs	1.11	0.0896444	4477.87	0.375273	8231.18	1.1134	4.27524	0.969725	0.459627	2206.28	0.136295	2348.15	0.102422	3636.14	0.0690046	3989.35	0.00875699	11293.4	0.885991	0.0703035	1748.05	0.991609	0.995896
131	984.35	984.45	z1Cs	1.11	0.0876859	4477.81	0.35501	8231.03	1.11008	4.40821	0.971609	0.447307	2206.14	0.124259	2346.69	0.101191	3635.61	0.0641391	3989.14	0.0101766	11304.5	0.877289	0.0750457	1748.24	0.991244	0.995722
131	984.45	984.55	z1Cs	1.16	0.0908844	4478.41	0.321032	8220.57	1.10044	3.84318	0.973166	0.450715	2205.53	0.169048	2348.47	0.108435	3636.44	0.0815248	3990.18	0.0085651	11293.9	0.887955	0.0421121	1747.37	0.992337	0.994687
131	984.55	984.65	z1Cs	1.16	0.0862885	4478.43	0.318456	8213.55	1.09859	3.83725	0.970542	0.434673	2205.43	0.15256	2346.35	0.0927763	3632.75	0.0659618	3990.97	0.00785296	11286.4	0.894478	0.0425138	1747.56	0.987265	0.995868
131	984.65	984.75	z1Cs	1.16	0.0761074	4477.78	0.316646	8206.58	1.07974	3.60065	0.969278	0.412655	2205.27	0.165373	2347.71	0.0941518	3636.99	0.0747193	3993.21	0.00833185	11297.6	0.907327	0.0362004	1747.73	0.988233	0.997018
131	984.75	984.85	z1Cs	1.16	0.0690106	4477.29	0.312821	8221.98	1.06942	3.63737	0.970737	0.388782	2205.38	0.163348	2347.25	0.108387	3644.84	0.0948219	3997.99	0.010059	11309.1	0.914722	0.0357554	1747.55	0.993581	0.997317
131	984.85	984.95	z1Cs	1.16	0.079363	4477.21	0.299931	8215.25	1.07304	3.43821	0.971155	0.410021	2205.73	0.17314	2347.17	0.124547	3645.42	0.103722	3997.29	0.0121288	11317.5	0.8996	0.0341935	1747.48	1.00334	0.999011
131	984.95	985.05	z1Cs	0.975	0.108057	4477.97	0.39423	8217.52	1.09842	4.04549	0.970089	0.455282	2206.08	0.168396	2348.7	0.139846	3645.33	0.102018	3996.96	0.0158893	11307.8	0.890789	0.0192525	1748.16	1.01157	0.995946
131	985.05	985.15	z1Cs	0.975	0.0907833	4476.9	0.399553	8214.35	1.07903	4.06144	0.9694	0.435615	2206.01	0.16051	2347.84	0.128522	3647.83	0.0964371	3995.92	0.0164652	11301.3	0.898382	0.0202391	1748.01	1.01189	0.997832
131	985.15	985.25	z1Cs	0.975	0.0744585	4475.35	0.404408	8225.47	1.06246	4.22463	0.965224	0.390209	2205.93	0.159154	2347.99	0.121429	3651.52	0.100852	3995.67	0.0170725	11301.6	0.908127	0.0204172	1747.61	1.00613	0.999143
131	985.25	985.35	z1Cs	0.975	0.085387	4476.51	0.376964	8223.58	1.07401	4.16348	0.964786	0.433735	2206.18	0.175784	2349.07	0.120737	3646.63	0.0891134	3995.99	0.0144818	11305.4	0.889928	0.0212315	1747.47	1.00775	0.999847
131	985.35	985.45	z1Cs	0.975	0.0797336	4476.45	0.375025	8222.88	1.07144	4.28839	0.963361	0.400231	2205.99	0.182499	2348.23	0.120566	3649.6	0.0978199	3995.86	0.014531	11301.1	0.887821	0.018704	1747.7	1.00678	1.00041
131	985.45	985.55	z1Cs	0.714	0.0801664	4476.43	0.369701	8226.47	1.06864	4.12079	0.966725	0.411335	2205.97	0.191305	2349.34	0.127085	3651.29	0.112119	3996.1	0.0151976	11306	0.890269	0.0183351	1747.55	1.00565	0.999484
131	985.55	985.65	z1Cs	0.714	0.0774651	4477.19	0.373689	8221.88	1.06366	3.94884	0.959868	0.411505	2206.04	0.188702	2348.14	0.131378	3652.51	0.123381	3993.05	0.0134845	11301.1	0.895117	0.0185271	1747.42	1.00379	1.00149
131	985.65	985.75	z1Cs	0.714	0.0796298	4477.12	0.35761	8217.64	1.07294	4.01577	0.967325	0.434137	2206	0.201891	2348.27	0.147484	3654.21	0.148699	3994.49	0.0129879	11304.9	0.8806	0.0166055	1747.6	1.00981	0.998159
131	985.75	985.85	z1Cs	0.714	0.0811981	4476.92	0.342446	8221.87	1.07909	4.18903	0.966534	0.45066	2205.99	0.194101	2347.49	0.13817	3653.49	0.12612	3996.21	0.0135304	11303.2	0.866685	0.0199166	1746.76	1.02429	1.00113
131	985.85	985.95	z1Cs	0.714	0.0831515	4476.77	0.322613	8222.02	1.08294	3.98529	0.963746	0.474167	2205.8	0.184304	2347.07	0.147595	3655.21	0.128086	3996.59	0.0140958	11302.4	0.869646	0.0198887	1747.11	1.03706	1.00523
131	985.95	986.05	z1Cs	0.0011	0.0782788	4476.22	0.33967	8189.99	1.06452	2.92242	0.974072	0.456508	2205.6	0.207233	2347.99	0.141293	3653.07	0.122571	3996.93	0.0158443	11334.2	0.915499	0.0223124	1747.51	1.02191	1.00644
131	986.05	986.15	z1Cs	0.0011	0.079568	4475.86	0.357666	8189.1	1.06879	3.27304	0.960671	0.469322	2205.37	0.214376	2348.18	0.152112	3657.2	0.127511	3994.99	0.0183858	11333.1	0.91636	0.0215746	1746.6	1.03144	1.0051
131	986.15	986.25	z1Cs	0.0011	0.0904929	4476.42	0.360177	8190.2	1.10107	3.25203	0.972614	0.529333	2205.56	0.187868	2348.14	0.135881	3648.07	0.098005	3995.16	0.0145511	11322.3	0.921173	0.0477805	1746.82	1.03089	1.01225
131	986.25	986.35	z1Cs	0.0213	0.102555	4477.5	0.377409	8210.95	1.14189	3.63606	0.965419	0.564857	2205.74	0.145187	2344.3	0.135563	3644.68	0.0853023	3992.34	0.0115154	11325.9	0.906859	0.0679027	1746.9	1.03738	1.02937
131	986.35	986.45	z1Cs	0.0213	0.108175	4478.01	0.35999	8216.22	1.12836	3.3147	0.971544	0.551767	2205.16	0.161555	2346.66	0.144103	3645.43	0.0923854	3993.83	0.012677	11349.1	0.907472	0.0307242	1746.55	1.03181	1.04338
131	986.45	986.55	z1Cs	0.0213	0.10295	4478.06	0.351651	8216.05	1.12442	3.36514	0.97523	0.516428	2205.68	0.211165	2346.16	0.143256	3646.14	0.0899912	3993.95	0.0144634	11339.7	0.903365	0.0398824	1746.39	1.02112	1.05694
131	986.55	986.65	z1Cs	0.0213	0.10186	4477.93	0.3448	8214.7	1.11942	3.09547	0.977878	0.517429	2205.63	0.150787	2344.32	0.133877	3644.31	0.0850829	3993.33	0.010816	11333.8	0.919085	0.0391407	1746.53	1.01668	1.06194
131	986.65	986.75	z1Cs	0.0213	0.086373	4476.29	0.356515	8210.52	1.1091	3.17985	0.949791	0.497889	2205.79	0.179266	2347.48	0.143535	3652.9	0.0963423	3995.32	0.0133344	11333	0.927149	0.0398924	1746.56	1.02272	1.05873
131	986.75	986.85	z1Cs	0.0213	0.0888915	4476.15	0.325131	8198.17	1.10622	2.82973	0.985492	0.5117	2205.54	0.15281	2339.95	0.143346	3654.39	0.0994505	3996.29	0.0115683	11324.8	0.941541	0.0244068	1746.31	1.03073	1.05875
131	986.85	986.95	z1Cs	0.0213	0.0933857	4477.51	0.304972	8208.09	1.09915	2.96513		0.501848	2205.57	0.230528	2348.64	0.150792	3651.59	0.108753	3995.62	0.0124807	11326.1	0.909183	0.0224202	1746.07	1.02481	1.06442
131	986.95	987.05	z1Cs	0.0213	0.106381	4478.33	0.370622	8195.23	1.11651	2.84243	0.991869	0.529533	2205.6	0.239194	2348.73	0.154424	3647.05	0.103387	3996.34	0.0130402	11313.8	0.940852	0.0227687	1747.68	1.02412	1.05724
131	987.05	987.15	z1Cs	0.0027	0.112077	4478.63	0.38301	8200.25	1.13629	3.27813	0.991726	0.519666	2205.58	0.221302	2348.56	0.150706	3646.05	0.0978425	3995.62	0.012142	11323.1	0.921729	0.0279926	1746.86	1.01533	1.07769
131	987.15	987.25	z1Csr	0.0027	0.102942	4478.22	0.373582	8201.03	1.13286	3.34131	0.99124	0.442503	2206.33	0.177478	2347.91	0.152942	3650.77	0.110234	3997.57	0.0146871	11317.3	0.931221	0.0513086	1746.29	0.998634	1.15077
131	987.25	987.35	z1Csr	0.0027	0.0965267	4477.97	0.339645	8189.14	1.12193	3.03939	0.979205	0.441577	2206.3	0.181157	2348.49	0.151995	3652.36	0.113334	3998.65	0.0142708	11327.2	0.943216	0.0498047	1746.34	0.999151	1.15196
131	987.35	987.45	z1Csr	0.0027	0.0943588	4478.49	0.332852	8202.54	1.12667	3.1893	0.961395	0.419767	2206.62	0.173983	2346.82	0.151576	3652.04	0.108161	3996.53	0.0167826	11330	0.926838	0.0516217	1746.82	0.991755	1.15131
131	987.45	987.55	z1Csr	0.0027	0.0878917	4478.17	0.302189	8189.17	1.11964	2.79733	0.953008	0.344781	2206.78	0.114478	2347.99	0.120786	3648.29	0.0822333	3995.63	0.01012	11312.5	0.962727	0.0606308	1747.09	0.96937	1.19475
131	987.55	987.65	z1Csr	0.0027	0.0804968	4477.29	0.278272	8188.07	1.10167	2.54215	0.94956	0.310004	2207.21	0.108007	2347.7	0.12683	3654.5	0.0889753	3994.24	0.0115212	11314.4	0.984288	0.0561401	1747.62	0.97635	1.19484
131	987.65	987.75	z1Csr	0.0027	0.076135	4476.2	0.261558	8184.24	1.09625	2.66107	0.946719	0.292115	2207.51	0.106878	2346.5	0.148455	3662.81	0.10332	3992.21	0.0150278	11312.3	0.965731	0.0552677	1747.83	0.989066	1.20311
131	987.75	987.85	z1Csr	0.0027	0.0592154	4475	0.243545	8197.19	1.07306	2.69941	0.945669	0.357731	2207.05	0.16324	2345.5	0.128566	3671.28	0.103263	3987.3	0.0123308	11315.7	0.9626	0.0412974	1748.69	1.01863	1.14317
131	987.85	987.95	z1Csr	0.0027	0.0405703	4473.25	0.29875	8210.9	1.0498	3.03936	0.943137	0.297159	2207.05	0.126013	2344.8	0.119608	3678.38	0.109861	3985.25	0.0198952	11326.9	0.938936	0.0386872	1749.24	0.98951	1.14472
131	987.95	988.05	z1Csr	0.0027	0.0401733	4472.22	0.425162	8170.76	1.05205	2.91541	0.942238	0.250472	2206.63	0.104033	2346.03	0.10959	3688.98	0.125679	3990.9	0.0236532	11327.7	1.05369	0.0400217	1749.72	0.958553	1.18292
133	1498.46	1498.56	z1K	0.0009	0.00536056	4472.18	0.0187343	8263.93	0.913072	1.0672		0.0152719	2211.69	0.198641	2341.74	0.0653522	3673.09	0.0440386	3971.93	0.0949358	11243.3	1.02734	0.021933	1748.98	1.00306	0.996281
133	1498.56	1498.66	z1K	0.0009	0.0079497	4480.66	0.0160602	8247.49	0.904867	1.04231		0.020934	2210.71	0.324965	2342.24	0.0816516	3674.41	0.0486323	3976.46	0.107013	11221.8	1.00818	0.0270995	1748.78	1.02237	0.997287
133	1498.66	1498.76	z1K	0.0009	0.00486822	4460.14	0.0157737	8255.76	0.89165	1.04527	0.979502	0.0261801	2209.49	0.153551	2339.32	0.0700441	3667.8	0.0521629	3974.23	0.0869166	11232.8	1.02801	0.0208424	1748.65	0.999384	0.994524
133	1498.76	1498.86	z1K	0.0009	0.0048357	4462.2	0.0179584	8257.85	0.896929	1.05364		0.0231369	2210.49	0.159709	2339.93	0.0707509	3666.96	0.0535176	3975.09	0.0923981	11226.1	1.01589	0.0221966	1748.47	0.993253	0.995908
133	1498.86	1498.96	z1K	0.0009	0.00533461	4464.74	0.0230471	8260.99	0.908991	1.05997		0.0259458	2209.57	0.130851	2340.54	0.0776328	3668.87	0.0715733	3973.79	0.0848943	11234.5	1.02287	0.0253752	1748.93	0.980573	1.00035
133	1498.96	1499.06	z1K	0.0009	0.00456189	4465.62	0.0285394	8253.19	0.913941	1.07005		0.0277631	2210.36	0.135728	2340.97	0.0729577	3670.4	0.0593065	3975.19	0.103858	11249.4	1.00463	0.0221396	1748.43	0.990614	1.00051
133	1499.06	1499.16	z1K	0.0025	0.0123927	4491.63	0.0267631	8371.7	0.940216	1.09016	0.975125	0.0220141	2213.77	0.508185	2344.23	0.11114	3678.78	0.0727344	3980.19	0.169883	11227.1	1.16961	0.056886	1748.36	1.00864	1.00142
133	1499.16	1499.26	z1K	0.0025	0.0104841	4492.01	0.0356247	8261.35	0.93281	1.02278	1.00036	0.0145415	2215.29	0.563211	2344.08	0.100347	3677.62	0.0635412	3979.47	0.198078	11251.6	1.03092	0.0520929	1748.05	1.01598	0.999951
133	1499.26	1499.36	z1K	0.0025	0.0114461	4493.18	0.0309248	8256.43	0.924297	1.01838	0.990955	0.0124636	2208.84	0.564884	2344.16	0.0989362	3678.62	0.0576198	3977.36	0.213403	11281.4	1.0129	0.051516	1748.36	1.02114	1.0024
133	1499.36	1499.46	z1K	0.0025	0.0106129	4492.57	0.0240716	8261.61	0.925739	1.02286		0.00396774	2207.23	0.591482	2344.04	0.0923513	3678.89	0.0523801	3976.81	0.212483	11306.4	1.01332	0.0547294	1748.63	1.03126	1.00269
133	1499.46	1499.56	z1K	0.0025	0.0106324	4493.05	0.0249255	8247.72	0.929238	1.0276	0.983766			0.579069	2343.9	0.100495	3677.5	0.063357	3979.54	0.177516	11278.5	1.00357	0.0557122	1748.53	1.02044	1.00238
133	1499.56	1499.66	z1K	0.0025	0.0105395	4492.3	0.0241677	8309.21	0.926105	1.04201				0.608379	2343.94	0.10476	3676.16	0.0650935	3979.84	0.182677	11243	1.08707	0.0573518	1748.32	1.02235	0.999494
133	1499.66	1499.76	z1K	0.0025	0.0108132	4490.72	0.0219388	8387.7	0.925471	1.09696	0.989029	0.00774158	2191.04	0.601651	2344.05	0.110786	3674.82	0.070277	3977.66	0.196657	11248.4	1.16499	0.0571401	1748.38	1.02283	0.999138
133	1499.76	1499.86	z1K	0.0016	0.0103034	4487.07	0.0103992	8527.74	0.932837	1.23347	1.00271	0.00527224	2204.79	0.59591	2344.05	0.110011	3673.72	0.0676304	3973.78	0.214239	11267.6	1.37089	0.0602106	1748.18	1.02854	1.00067
133	1499.86	1499.96	z1K	0.0016	0.0096994	4481.41	0.0104574	8561.77	0.950433	1.39477	0.980711	0.0257525	2201.79	0.574278	2344.07	0.112751	3672.65	0.0688116	3973.66	0.201268	11259.3	1.56717	0.0653491	1748.46	1.02511	1.00345
133	1499.96	1500.06	z1K	0.0016	0.00963026	4477.73	0.01327	8537.29	0.934559	1.29399	0.976234	0.0025665	2212.46	0.546049	2342.78	0.112489	3668.95	0.0694691	3973.46	0.217992	11238.8	1.42044	0.058392	1748.12	1.0158	1.00117
133	1500.06	1500.16	z1K	0.0016	0.0112992	4472.82	0.0332476	8393.89	0.917522	1.13165	0.978312	0.0104476	2208.64	0.523893	2342.16	0.12423	3666.36	0.0792441	3974.41	0.240324	11224.4	1.21495	0.054453	1747.2	1.01005	1.00052
133	1500.16	1500.26	z1K	0.0016	0.00958472	4468.18	0.0357318	8372.47	0.909233	1.09288	0.983077	0.0029782	2207.25	0.563327	2341.66	0.106758	3665.61	0.0590352	3973.88	0.287222	11223.4	1.22002	0.0588758	1747.73	1.03082	1.00174
133	1500.26	1500.36	z1K	0.0016	0.00826062	4465.89	0.0196987	8363.56	0.907109	1.10327	0.990158	0.00068704	2201.08	0.569654	2341.33	0.0934555	3664.68	0.0534324	3972.65	0.177889	11216.3	1.13638	0.0582625	1747.13	1.03668	1.00133
133	1500.36	1500.46	z1K	0.0016	0.00861742	4467.56	0.00919244	8290.43	0.89453	1.01616	0.995089			0.510138	2341.31	0.0971922	3666.12	0.0607066	3974.39	0.129565	11206.8	1.05146	0.0558048	1746.77	1.02142	0.996751
133	1500.46	1500.56	z1K	0.0016	0.00722938	4463.72	0.0119862	8261.82	0.873232	1.02232	0.973427	0.0239299	2209.55	0.165128	2337.38	0.067733	3664.05	0.0473004	3973.09	0.10266	11223.8	1.04502	0.0318035	1749.58	0.981436	0.993664
133	1500.56	1500.66	z1K	0.0016	0.00442336	4468.26	0.0151868	8254.9	0.891387	1.03444	0.984308	0.0250928	2208.92	0.145063	2339.26	0.0655924	3669.46	0.0488833	3972.76	0.0818498	11240	1.04263	0.0306098	1750.06	0.982008	0.994201
133	1500.66	1500.76	z1K	0.0016	0.00826995	4490.86	0.0167342	8229.54	0.895129	0.998682	0.980753	0.0167099	2215.33	0.366395	2342.7	0.0963171	3676.32	0.0571793	3977.38	0.112961	11208.1	1.03433	0.0456435	1747.81	0.998111	0.991522
133	1500.76	1500.86	z1K	0.0016	0.00860965	4492.79	0.019377	8222.24	0.896232	0.997872	0.982263	0.0210337	2214.02	0.352674	2342.95	0.0993358	3676.32	0.0591327	3978.81	0.103113	11202.9	1.05866	0.0472641	1748.14	0.992474	0.991866
133	1500.86	1500.96	z1K	0.0016	0.00962172	4495.17	0.0203134	8227.89	0.889702	1.00402	0.974275	0.019207	2216.04	0.378009	2343.02	0.104657	3676.9	0.0529324	3983.48	0.113185	11202.8	1.05282	0.046653	1747.81	1.00163	0.990166
133	1500.96	1501.06	z1K	0.01	0.00995649	4495.16	0.0221533	8229.36	0.894744	0.998243	0.984494	0.0248961	2214.49	0.352194	2343.06	0.108944	3676.79	0.0625717	3979.72	0.102138	11203.1	1.07467	0.0487189	1747.57	0.991525	0.991573
133	1501.06	1501.16	z1K	0.01	0.00660565	4485.38	0.0250247	8224.1	0.91864	1.00672	0.98307	0.0271045	2211.22	0.307112	2342.36	0.0913542	3676.88	0.0650269	3981.62	0.0930528	11207.3	1.01966	0.0457807	1748.6	0.992726	0.993984
133	1501.16	1501.26	z1K	0.01	0.00939894	4492.02	0.0318666	8240.27	0.915441	1.01609		0.0258796	2214.27	0.388641	2343.1	0.0970136	3676.95	0.0541989	3977.36	0.133203	11208	1.06223	0.0479578	1748.03	0.998322	0.992365
133	1501.26	1501.36	z1K	0.01	0.00912132	4488.72	0.0348444	8233.9	0.927053	1.03959		0.0214074	2212.22	0.386179	2343.71	0.0919803	3677.05	0.0582744	3980.41	0.166325	11215.5	0.995594	0.0329569	1748.46	1.01078	0.991619
133	1501.36	1501.46	z1K	0.01	0.0118592	4493.12	0.0306212	8252.11	0.91903	1.04525		0.0150926	2215.59	0.489722	2343.85	0.116768	3677.78	0.0641098	3977.6	0.181338	11202.8	1.03076	0.0375677	1748.21	1.00903	0.991411
133	1501.46	1501.56	z1K	0.01	0.010043	4493.18	0.029401	8228.62	0.915098	1.00798		0.0171649	2213.29	0.433351	2344.09	0.110775	3676.37	0.0661262	3978.09	0.138101	11205.5	1.01953	0.0367372	1747.68	0.997656	0.992973
133	1501.56	1501.66	z1K	0.01	0.0102005	4493.24	0.0247765	8225.1	0.908909	0.998934		0.0149104	2214.86	0.445311	2343.96	0.108136	3676.61	0.0612809	3977.44	0.132492	11204.4	1.01683	0.0367591	1748.45	1.00049	0.991953
133	1501.66	1501.76	z1K	0.003	0.00963829	4492.71	0.0209113	8225.95	0.912209	1.01022		0.0207751	2214	0.416006	2343.97	0.0969762	3678.2	0.0573354	3977.34	0.109211	11205.1	0.992813	0.0334268	1748.37	1.00667	0.992062
133	1501.76	1501.86	z1K	0.003	0.00956288	4493.45	0.0203513	8231.38	0.91368	1.01811		0.0176738	2214.54	0.462854	2343.89	0.091383	3677.81	0.0497571	3975.95	0.119783	11205.7	0.985262	0.0345361	1748.67	1.0179	0.988954
133	1501.86	1501.96	z1K	0.003	0.00873923	4492.8	0.0212063	8234.92	0.911752	1.01667		0.0198534	2213.24	0.373165	2343.73	0.0930854	3677.3	0.0542391	3976.11	0.0984582	11209.8	1.00608	0.031084	1748.27	1.00384	0.991384
133	1501.96	1502.06	z1K	0.003	0.0102185	4493.53	0.0201446	8234.8	0.908801	1.00498		0.0160964	2213.42	0.466108	2343.84	0.0985203	3676.9	0.0546513	3976.53	0.121034	11206.9	0.986223	0.0347267	1748.1	1.01672	0.989041
133	1502.06	1502.16	z1K	0.003	0.00889499	4492.14	0.0210204	8238.76	0.915029	1.00543		0.0237647	2213.58	0.374382	2343.64	0.09761	3676.22	0.0570492	3977.31	0.0907104	11209.5	1.0231	0.0327981	1747.43	0.998442	0.99211
133	1502.16	1502.26	z1K	0.003	0.0112702	4494.36	0.0277804	8286.14	0.916496	0.991276		0.0180189	2215.39	0.457	2343.66	0.109055	3676.41	0.0617588	3975.49	0.140528	11198.6	1.05326	0.0387302	1748.25	1.00812	0.992638
133	1502.26	1502.36	z1K	0.003	0.0119985	4494.3	0.0422738	8238.67	0.91751	0.990999		0.0196531	2215.68	0.475388	2343.72	0.119263	3675.98	0.0686001	3977.5	0.162827	11200.8	1.03958	0.0418292	1747.39	1.00511	0.992773
133	1502.36	1502.46	z1K	0.003	0.0105562	4494.16	0.0380725	8227.31	0.907446	1.04487		0.0189663	2216.11	0.454781	2343.47	0.102968	3676.41	0.0577258	3976.3	0.182124	11211.5	1.03885	0.0438822	1747.46	1.00217	0.990134
133	1502.46	1502.56	z1K	0.003	0.0098697	4494.2	0.0343659	8236.25	0.916812	1.03726		0.0247347	2214.77	0.453942	2343.5	0.0949299	3677.31	0.0514666	3975.86	0.175938	11229.5	1.04918	0.0426499	1747.56	1.00795	0.990143
133	1502.56	1502.66	z1K	0.003	0.0100325	4492.52	0.0323029	8247.57	0.925257	1.05335	0.988787	0.00256237	2215.33	0.54255	2343.7	0.0956762	3678.33	0.0532031	3976.62	0.185728	11232.6	1.03836	0.0484394	1747.9	1.01502	0.989761
133	1502.66	1502.76	z1K	0.003	0.0106763	4490.62	0.047461	8263.6	0.930526	1.14317				0.550057	2343.7	0.104634	3678.55	0.0608868	3976.26	0.168381	11242.3	1.08991	0.049914	1748.05	1.0096	0.99298
133	1502.76	1502.86	z1K	0.003	0.00997944	4492.77	0.032936	8246.5	0.921996	1.04577		0.0117959	2210.47	0.513304	2343.85	0.0977304	3677.59	0.0549577	3976.67	0.177465	11241.5	1.03312	0.0477358	1747.75	1.00456	0.991219
133	1502.86	1502.96	z1K	0.003	0.0102986	4494.29	0.0283217	8224.43	0.91634	1.02264		0.0181659	2213.93	0.459779	2343.9	0.0936076	3678.07	0.051437	3977.3	0.161684	11228	1.02583	0.0427604	1747.6	1.00486	0.99073
133	1502.96	1503.06	z1K	0.003	0.0105437	4494.75	0.0304778	8226.16	0.922513	1.0197		0.0165024	2214.81	0.426476	2343.91	0.0955486	3678.03	0.054644	3977.44	0.154354	11226.2	1.02945	0.0432906	1747.37	0.999413	0.99148
133	1503.06	1503.16	z1K	0.003	0.0087753	4490.31	0.0347033	8240.43	0.92175	1.07111		0.00866341	2216.11	0.529528	2343.99	0.0828123	3678.35	0.0442816	3975.01	0.185422	11234.9	1.02382	0.0456181	1748.28	1.02554	0.988701
133	1503.16	1503.26	z1K	0.003	0.00901479	4491.51	0.0428666	8261.17	0.931082	1.12945		0.0102976	2211.12	0.528328	2344.23	0.0922637	3678.53	0.0551862	3977.67	0.169408	11229	1.08911	0.0493043	1747.93	1.01375	0.992188
133	1503.26	1503.36	z1K	0.003	0.017122	4493.02	0.0433698	8290.84	0.94195	1.04532		0.0185937	2211.53	0.43315	2344.12	0.138175	3675.6	0.0960979	3981.67	0.221375	11215.5	1.13342	0.0574035	1748.68	0.985972	1.00423
133	1503.36	1503.46	z1K	0.003	0.00904315	4489.3	0.03983	8335.64	0.948234	1.18196		0.016705	2210.76	0.501208	2344.44	0.0940411	3678.11	0.0619378	3980.9	0.134072	11240.1	1.14916	0.0598464	1748.71	1.00142	1.00011
133	1503.46	1503.56	z1K	0.003	0.00963468	4488.62	0.0730127	8413.88	0.955923	1.37558		0.0108245	2210.65	0.504905	2344.32	0.100944	3680.15	0.0635103	3980.11	0.121774	11248.4	1.29037	0.0607715	1748.51	1.00045	0.999696
133	1503.56	1503.66	z1K	0.003	0.00889557	4488.73	0.0549634	8313.51	0.95003	1.2357		0.0173126	2210.37	0.479517	2344.35	0.0931704	3677.58	0.063244	3982.37	0.1031	11238.1	1.18448	0.0591364	1748.74	0.999124	1.00246
133	1503.66	1503.76	z1K	0.003	0.00976	4490.7	0.0194565	8263.12	0.936612	1.07018		0.0168829	2212.23	0.439429	2344.05	0.0846362	3678.93	0.0525009	3978.29	0.105782	11238.3	1.04526	0.0524485	1748.79	0.998727	0.99982
133	1503.76	1503.86	z1K	0.0012	0.00863881	4491.21	0.02011	8260.47	0.926168	1.05698		0.0112634	2203.11	0.470829	2343.69	0.0816271	3678.89	0.0456709	3974.85	0.126539	11232.4	1.03675	0.0507063	1748.42	1.00739	0.994483
133	1503.86	1503.96	z1K	0.0012	0.00758647	4490.56	0.0196975	8234.67	0.925918	1.01672	1.00136	0.022412	2213.04	0.338718	2343.56	0.0811508	3676.21	0.0516968	3978.04	0.0965547	11226.2	1.02861	0.0463688	1748.61	0.984877	0.997424
133	1503.96	1504.06	z1K	0.0012	0.00711493	4487.15	0.0190095	8241.84	0.918082	1.02966		0.0314784	2212.19	0.334691	2342.86	0.078427	3674.73	0.0490254	3976.46	0.0853194	11223.6	1.03045	0.0438863	1749.38	0.995285	0.992418
133	1504.06	1504.16	z1K	0.0012	0.00809719	4489.51	0.0217666	8250.53	0.919775	1.01847		0.0244738	2215.17	0.42397	2342.91	0.0900973	3674	0.0574794	3976.97	0.104953	11206.4	1.03704	0.0523425	1748.48	0.99473	0.991472
133	1504.16	1504.26	z1K	0.0012	0.00798029	4488.41	0.026905	8254.97	0.922556	1.04255	0.988865	0.0275757	2214.47	0.401084	2342.97	0.093717	3673.76	0.0614409	3977.24	0.10861	11206.9	1.07799	0.0533038	1748.45	0.989467	0.992134
133	1504.26	1504.36	z1K	0.0012	0.00789538	4491.02	0.0356121	8245.3	0.919808	1.00783		0.028589	2213	0.383881	2343.03	0.0957041	3672.52	0.0658774	3978.28	0.133313	11203.9	1.07016	0.0542628	1748.11	0.984032	0.995559
133	1504.36	1504.46	z1K	0.0012	0.00828211	4489.61	0.0444737	8243.84	0.925349	1.02164		0.0280943	2214.35	0.388804	2343.18	0.0914046	3673.68	0.0557384	3974.76	0.200021	11215.8	1.06993	0.0353282	1748.75	1.00162	0.993538
133	1504.46	1504.56	z1K	0.0012	0.00736634	4487.65	0.0253342	8247.19	0.92492	1.04486		0.0293321	2212.52	0.358568	2343.25	0.08055	3674.7	0.0485865	3975.52	0.110845	11222.3	1.03979	0.0300873	1749.03	1.00677	0.995247
133	1504.56	1504.66	z1K	0.0012	0.00792275	4484.22	0.0229727	8268.81	0.946586	1.0485		0.0273651	2212.78	0.307074	2342.35	0.0672011	3674.98	0.0490886	3980.01	0.0912173	11229	1.01389	0.0292058	1749.94	1.00113	0.997926
133	1504.66	1504.76	z1K	0.0012	0.00815945	4489.6	0.0204275	8245.38	0.932419	1.03735		0.0192652	2213.66	0.429669	2343.71	0.0806627	3676.8	0.0481463	3976.68	0.114301	11213.5	1.00883	0.0341341	1748.61	1.00622	0.995249
133	1504.76	1504.86	z1K	0.0012	0.00798012	4489.79	0.0273777	8279.38	0.93517	1.10687		0.0178898	2213.82	0.483621	2343.57	0.0774934	3678.59	0.0428109	3974.05	0.12165	11217.9	1.04731	0.0354461	1748.91	1.02306	0.993953
133	1504.86	1504.96	z1K	0.0012	0.00825579	4487.28	0.0208199	8258.55	0.936516	1.06551		0.0284885	2211.97	0.294993	2342.69	0.0784025	3675.7	0.0550466	3980.65	0.0950733	11225.1	1.02377	0.0309867	1748.81	0.988045	0.99745
133	1504.96	1505.06	z1K	0.0012	0.00674887	4484.71	0.0198956	8240.04	0.907928	1.02953		0.0285445	2212.08	0.299312	2342.64	0.0835792	3673.27	0.0518359	3974.39	0.0875547	11212.6	1.04906	0.028978	1748.56	0.99684	0.993249
133	1505.06	1505.16	z1K	0.0012	0.00694193	4486.15	0.0205161	8244.09	0.916976	1.0421		0.0258494	2212.71	0.324897	2342.89	0.0816025	3673.36	0.0514428	3974.94	0.0918797	11210.5	1.04695	0.0298946	1748.02	0.998248	0.991577
133	1505.16	1505.26	z1K	0.0012	0.00727522	4486.82	0.0209368	8254.68	0.920257	1.04647		0.0254021	2213.48	0.330159	2343.03	0.0811968	3672.87	0.0511019	3975.6	0.0980558	11216.5	1.05803	0.0302527	1748.36	1.00007	0.992926
133	1505.26	1505.36	z1K	0.0012	0.00649939	4485.6	0.0268088	8255.26	0.909842	1.02823		0.0290634	2211.65	0.345246	2342.62	0.080952	3672.12	0.0487826	3973.17	0.0821759	11222.8	1.02504	0.029093	1747.81	1.00615	0.990811
133	1505.36	1505.46	z1K	0.0012	0.00969791	4484.28	0.0587858	8270.62	0.920661	1.03196	0.985419	0.0236561	2214.31	0.312541	2342.44	0.106306	3672.19	0.0746612	3974.64	0.199308	11241.4	1.10679	0.0308124	1747.85	0.986446	0.989662
133	1505.46	1505.56	z1K	0.0012	0.00854976	4477.07	0.0847106	8241.57	0.928286	1.09084	0.979721	0.0316569	2209.96	0.141321	2341.16	0.0900531	3674.74	0.071474	3975.01	0.148341	11291.1	1.09233	0.0256584	1748.92	0.986717	0.987895
133	1505.56	1505.66	z1K	0.001	0.00430173	4473.97	0.0516901	8233.56	0.921162	1.10573	0.978955	0.0436208	2208.98	0.117221	2341.38	0.0647206	3677.69	0.0529439	3971.22	0.0801574	11320.1	1.04717	0.0230405	1749.38	1.00387	0.986662
133	1505.66	1505.76	z1K	0.001	0.00443965	4471.03	0.0528507	8225.04	0.91757	1.12418	0.975096	0.0548761	2208.93	0.109823	2341.3	0.0725007	3682.68	0.0630897	3973.76	0.0547308	11352.7	1.02303	0.0246892	1749.19	1.00258	0.987424
133	1505.76	1505.86	z1K	0.001	0.004484	4470.15	0.0615173	8215.8	0.92986	1.15538	0.983452	0.0568341	2209.35	0.0730484	2340.75	0.0636867	3692.36	0.0737901	3976.26	0.0405713	11364.6	0.972609	0.0218956	1748.49	0.99466	0.988299
133	1505.86	1505.96	z1K	0.0028	0.00512408	4472.87	0.0650215	8222.27	0.92365	1.19426	0.981335	0.070614	2208.89	0.0944059	2341.76	0.0745717	3689.77	0.0756309	3975.13	0.0451338	11372.4	0.96849	0.0220228	1748.88	1.00673	0.98796
133	1505.96	1506.06	z1K	0.0028	0.00650042	4477.76	0.0533225	8226.11	0.956078	1.19013	0.977863	0.0562438	2209.77	0.0596683	2340.99	0.059427	3695.96	0.0723912	3982.26	0.0293957	11368.9	0.99235	0.0210008	1749.66	0.990117	0.991113
133	1506.06	1506.16	z1K	0.0028	0.0061197	4472.02	0.0501268	8216.89	0.952782	1.17269	0.991919	0.0648588	2209.81	0.0737473	2341.81	0.0535652	3699.13	0.067111	3980.51	0.0290255	11364.9	0.970187	0.0212221	1749.74	0.995844	0.99509
133	1506.16	1506.26	z1K	0.024	0.00675371	4478.41	0.0424667	8221.95	0.940879	1.12934		0.0462072	2210.35	0.141605	2342.16	0.0670898	3691.52	0.0631756	3983.62	0.072754	11303.2	0.983901	0.0252053	1749.09	0.996645	0.991686
133	1506.26	1506.36	z1K	0.024	0.00762031	4484.3	0.0421871	8225.26	0.934871	1.16606		0.0430173	2210.42	0.175817	2342.76	0.0766629	3686.17	0.0554111	3981.9	0.102038	11298.2	0.989991	0.0295996	1750.04	0.993087	0.992045
133	1506.36	1506.46	z1K	0.024	0.00711057	4490.2	0.037683	8226.53	0.924982	1.06972		0.0325927	2211.1	0.215624	2342.76	0.0818616	3682.23	0.0488347	3981.75	0.113608	11287.4	1.033	0.030859	1748.74	0.988113	0.990583
133	1506.46	1506.56	z1K	0.024	0.00683774	4489.83	0.044445	8223.26	0.931665	1.06297		0.0350109	2211.37	0.213662	2342.76	0.07787	3679.36	0.0494152	3980.05	0.113143	11272.7	1.02961	0.0324135	1748.35	0.979569	0.989285
133	1506.56	1506.66	z1K	0.024	0.00696468	4491.12	0.0275264	8221.08	0.928301	1.04655		0.0301148	2212.18	0.278474	2342.9	0.0743173	3680.46	0.041515	3979.2	0.1006	11246.5	1.01149	0.0400412	1749.29	0.989738	0.987206
133	1506.66	1506.76	z1K	0.024	0.00559717	4487.28	0.0220823	8211.88	0.940432	1.05981		0.0377887	2211.17	0.21925	2342.29	0.0620011	3686.14	0.0427508	3979.52	0.0802859	11234.7	0.970417	0.0345162	1749.7	0.988894	0.988898
133	1506.76	1506.86	z1K	0.024	0.00473641	4481.81	0.0313354	8193.77	0.961852	1.13557	0.999751	0.0493452	2210.42	0.0722958	2340.78	0.0462135	3696.67	0.0471933	3987.19	0.0277477	11346.4	0.942084	0.0232816	1750.54	0.992118	0.992106
133	1506.86	1506.96	z1K	0.229	0.0043765	4480.8	0.0262803	8207.36	0.947245	1.08742		0.0364388	2209.35	0.0845233	2341.61	0.0582072	3691.72	0.045673	3985.26	0.0398782	11337.9	0.962961	0.0246937	1750.32	0.99105	0.987941
133	1506.96	1507.06	z1K	0.229	0.00489381	4485.13	0.023172	8209.12	0.941441	1.0638	0.988423	0.0329619	2210.14	0.126	2342.2	0.0604269	3685.95	0.0409423	3982.27	0.0500283	11290.4	0.978331	0.0285028	1750.42	0.989591	0.987135
133	1507.06	1507.16	z1T	0.457	0.00451843	4483.68	0.0232814	8213.14	0.950592	1.09708		0.0290487	2211.09	0.130978	2341.28	0.0532192	3676.25	0.0384499	3983.45	0.0492275	11273.2	0.963978	0.0304684	1750.44	0.98233	0.986919
133	1507.16	1507.26	z1T	0.457	0.00522442	4487.65	0.0202161	8211.81	0.93681	1.03242		0.0283528	2210.99	0.189886	2342.53	0.059976	3682.16	0.0358451	3978.06	0.0593567	11249.8	0.991822	0.0342531	1749.6	0.979143	0.985567
133	1507.26	1507.36	z1T	0.457	0.00322589	4481.32	0.0294629	8216	0.970442	1.1886	0.979951	0.0211398	2210.56	0.052267	2337.9	0.0428819	3680.89	0.0260977	3981.76	0.0386124	11317.4	0.90226	0.02026	1750.21	0.963659	0.984198
133	1507.36	1507.46	z1T	0.457	0.00423266	4483.14	0.0224007	8215.3	0.957232	1.12731	0.98176	0.0190702	2212	0.123914	2340.41	0.0504796	3677.38	0.023624	3977.52	0.0749087	11252.3	0.949428	0.0271449	1750.54	0.960205	0.987068
133	1507.46	1507.56	z1T	3.89	0.00503749	4485.72	0.0262513	8219.66	0.943132	1.05505		0.0257617	2211.41	0.146663	2342.08	0.0578174	3679.91	0.0371752	3980.03	0.0743699	11285.4	0.996763	0.0311061	1749.57	0.964632	0.986685
133	1507.56	1507.66	z1T	3.89	0.00595	4488.65	0.0372652	8222.37	0.943182	1.05714		0.024452	2211.28	0.167188	2342.68	0.0651901	3681.6	0.0424172	3979.31	0.113079	11292	1.01329	0.0329232	1749.64	0.966387	0.98574
133	1507.66	1507.76	z1T	1.78	0.00574956	4485.7	0.0296204	8204.52	0.944943	1.0648		0.046578	2211.57	0.323972	2343.05	0.0611009	3677.81	0.0357272	3975.37	0.0818632	11237.7	0.97172	0.0305861	1748.82	1.01898	0.991702
133	1507.76	1507.86	z1T	1.78	0.00503847	4482.46	0.0327599	8204.83	0.951077	1.16485	0.973773	0.0446933	2210.2	0.248534	2341.34	0.0556738	3674.23	0.0303351	3978.54	0.057493	11237.6	0.905235	0.0240806	1748.83	1.00737	0.993926
133	1507.86	1507.96	z1T	1.78	0.00545843	4484.81	0.0400541	8211.68	0.936945	1.11372	0.979392	0.0721567	2209.78	0.257146	2343.26	0.0657457	3681.74	0.0373605	3977.14	0.0389044	11266.5	0.982768	0.0266912	1749.35	1.02719	0.990575
133	1507.96	1508.06	z1T	0.153	0.00537666	4484.7	0.0345378	8209.37	0.932786	1.09742		0.0709446	2209.66	0.284035	2343.24	0.0667207	3680.69	0.0349276	3975.96	0.0419592	11260.4	0.994893	0.0246604	1748.86	1.03655	0.989036
133	1508.06	1508.16	z1T	0.153	0.00490847	4484.65	0.030366	8205.03	0.943098	1.08807		0.0480679	2210.23	0.232787	2343.08	0.0568452	3678.59	0.0320472	3976.88	0.044871	11243.9	0.967493	0.0230496	1748.85	1.0113	0.990084
133	1508.16	1508.26	z1T	0.153	0.0046634	4485.2	0.0313819	8204.38	0.940732	1.08027		0.0425616	2210.18	0.203785	2343.23	0.0577821	3678.42	0.0330524	3975.75	0.0453529	11240.6	0.976014	0.0231019	1749.31	1.00288	0.986256
133	1508.26	1508.36	z1T	0.037	0.00514367	4484.07	0.0309295	8210.58	0.93909	1.08289		0.0448114	2210.22	0.265931	2343.11	0.0629224	3677.51	0.0348136	3974.94	0.0498146	11225.1	0.974348	0.0278653	1749.44	1.01314	0.987869
133	1508.36	1508.46	z1T	0.037	0.00566371	4481.53	0.0290452	8203.45	0.938462	1.19758		0.120013	2209.98	0.225543	2343.6	0.0578541	3680.42	0.0372196	3979.83	0.0359996	11230	0.851098	0.0212532	1749.05	1.05854	1.00938
133	1508.46	1508.56	z1T	0.037	0.0155207	4476.37	0.186841	8215.69	0.990919	3.01411		0.18652	2212.21	0.181911	2342.93	0.0897023	3684.61	0.0655374	3989.42	0.033484	11348	0.798284	0.019644	1749.12	1.03724	1.04113
133	1508.56	1508.66	z1Cs	0.0327	0.026033	4478.3	0.312642	8198.84	1.0501	3.72206	0.989758	0.135491	2212.04	0.15279	2341.91	0.101465	3669.97	0.0819472	3988.91	0.0390835	11354.4	0.922691	0.0302394	1749.28	0.988103	1.09749
133	1508.66	1508.76	z1Cs	0.0098	0.0233026	4479.13	0.331122	8159.78	1.03617	3.32223		0.0448949	2212.18	0.0502816	2340.74	0.068654	3664.7	0.067084	3990.72	0.0378162	11356.2	0.952505	0.0289409	1749.71	0.951788	1.12634
133	1508.76	1508.86	z1Cs	0.0098	0.0208318	4478.69	0.348034	8158.57	1.02799	3.24882		0.0381919	2211.92	0.0431968	2339.66	0.0587614	3661.99	0.0589066	3990.72	0.0382289	11343.3	0.966714	0.0259817	1749.21	0.953856	1.12516
133	1508.86	1508.96	z1Cs	0.0098	0.022561	4478.42	0.34448	8160.81	1.03927	2.99321		0.0640561	2211.58	0.0579054	2337.86	0.0483046	3652.76	0.0470064	3989.52	0.0299217	11335.6	1.0074	0.0279287	1749.14	0.952688	1.17344
133	1508.96	1509.06	z1Cs	0.0098	0.0330388	4478.81	0.432576	8201.66	1.0648	5.20478	0.989399	0.224202	2212.68	0.168843	2343.7	0.0855137	3649.69	0.0613666	3991.19	0.0160723	11342.2	1.03912	0.0378915	1747.6	1.0142	1.07479
133	1509.06	1509.16	z1Cs	0.0098	0.0300039	4477.66	0.422005	8199.33	1.05421	5.08984	0.987275	0.176712	2212.3	0.145395	2343.15	0.0923364	3659.14	0.0777746	3989.58	0.0282662	11350.4	0.993964	0.0349374	1747.87	1.01251	1.05885
133	1509.16	1509.26	z1Cs	0.0098	0.0283324	4476.87	0.413564	8192.08	1.04666	4.54825	0.985679	0.195379	2212.44	0.18712	2342.76	0.107	3665.34	0.0891288	3987.75	0.0381148	11359.6	0.970198	0.0340841	1748.25	1.01646	1.04759
133	1509.26	1509.36	z1Cs	0.0098	0.0287872	4476.95	0.366171	8212.42	1.02122	3.9275	0.991272	0.22726	2209.82	0.378625	2343.57	0.147318	3673.25	0.0955696	3989.73	0.0817966	11365.9	0.882547	0.028759	1748.94	1.04308	1.02851
133	1509.36	1509.46	z1Cs	0.0098	0.0248332	4475.36	0.383642	8215.31	1.01341	3.94683		0.253519	2210.58	0.386379	2343.33	0.148747	3675.35	0.0968679	3989.82	0.0827569	11368.9	0.891687	0.0249076	1749.59	1.0503	1.0232
133	1509.46	1509.56	z1Cs	0.0098	0.0252622	4473.46	0.412915	8217.07	1.02577	4.04292		0.281877	2211.36	0.376329	2342.97	0.143656	3676.18	0.0897083	3989.51	0.0730046	11369.8	0.911125	0.0222212	1749.74	1.06411	1.02257
133	1509.56	1509.66	z1Cs	0.0098	0.027711	4473.17	0.436203	8212.26	1.03796	4.26919		0.304685	2211.72	0.368511	2342.86	0.150245	3676.34	0.0953665	3990.82	0.0664938	11369.1	0.920484	0.0216636	1749.82	1.07236	1.02389
133	1509.66	1509.76	z1Cs	0.004	0.0246466	4475.24	0.371738	8182.44	1.04558	3.45777	0.982335	0.2445	2211.67	0.252244	2341.22	0.105232	3668.44	0.0756582	3989.29	0.0333362	11355.3	0.96449	0.031274	1750.05	1.02646	1.11222
133	1509.76	1509.86	z1Cs	0.004	0.0307669	4476.32	0.412267	8191.13	1.06483	4.01743		0.287744	2212.57	0.283994	2343.01	0.131795	3672.7	0.0960696	3990.63	0.0298886	11356.1	1.00486	0.0415141	1748.84	1.04452	1.03901
133	1509.86	1509.96	z1Cs	0.004	0.0324719	4476.81	0.423767	8188.62	1.07611	4.45439	0.97844	0.30848	2212.91	0.316142	2342.94	0.141196	3671.47	0.0980155	3990.54	0.0313023	11359.5	1.01331	0.0411146	1749.15	1.05939	1.03341
133	1509.96	1510.06	z1Cs	0.004	0.0263841	4475.39	0.421437	8174.48	1.06607	4.2553		0.311665	2212.84	0.269306	2342.9	0.102543	3669.77	0.074792	3990.95	0.0210222	11343	1.00164	0.0314493	1750.77	1.05779	1.04938
133	1510.06	1510.16	z1Cs	0.004	0.0256647	4475.42	0.41032	8173.58	1.05754	3.90268		0.304906	2213.2	0.272606	2342.3	0.107859	3670.6	0.0792978	3990.28	0.0227474	11351	0.997618	0.0287613	1751.04	1.05677	1.05722
133	1510.16	1510.26	z1Cs	0.004	0.029262	4476.8	0.455664	8203.98	1.07378	4.86864		0.236306	2212.94	0.167351	2343.56	0.0780936	3658.03	0.0562142	3990.19	0.0175534	11316.5	1.03985	0.0464101	1748.83	1.01651	1.04753
133	1510.26	1510.36	z1Cs	0.004	0.0231201	4474.8	0.424631	8186.22	1.05029	4.02474		0.310163	2212.72	0.235538	2343.03	0.0681407	3670.96	0.0548894	3990.28	0.0178621	11320.7	1.01961	0.0283539	1750.94	1.07644	1.04452
133	1510.36	1510.46	z1Cs	0.004	0.0247234	4474.52	0.443291	8186.58	1.05366	4.17333	0.97662	0.305674	2212.47	0.225325	2343.65	0.0599206	3669.73	0.0509307	3990.52	0.0115152	11319.5	1.01755	0.0356279	1749.43	1.04639	1.02835
133	1510.46	1510.56	z1Csr	0.0056	0.0288119	4477.09	0.461796	8181.91	1.07538	4.98833		0.280203	2214.01	0.211242	2343.98	0.0573727	3654.99	0.0412614	3988.02	0.00968241	11316.9	1.01812	0.0426036	1749.06	1.03104	1.02596
133	1510.56	1510.66	z1Csr	0.0056	0.0250373	4475.89	0.455567	8178.42	1.05922	4.61074		0.268368	2213.26	0.207912	2343.5	0.0656281	3669.1	0.053056	3990.14	0.0182901	11337.3	0.992611	0.0366395	1749.05	1.02899	1.02142
133	1510.66	1510.76	z1Csr	0.0056	0.0212626	4474.77	0.43692	8167.39	1.03597	4.05101		0.268118	2212.77	0.215812	2343.04	0.0776568	3680.43	0.0656898	3990.97	0.0248477	11355.5	0.963287	0.0330869	1749.9	1.02917	1.03415
136	1048.5	1048.6	z1K	0.96	0.00712426	4476.27	0.10902	8224.56	0.945714	1.00279	0.988001	0.0284431	2210.02	0.114148	2342.21	0.170094	3661.8	0.202986	3983.79	0.187972	11222	1.12427	0.032134	1747.92	0.950272	1.00588
136	1048.6	1048.7	z1K	0.96	0.0039026	4473.17	0.0585546	8237.64	0.951519	1.04916	0.980228	0.0273728	2209.58	0.0701339	2339.96	0.0674078	3663.16	0.0852719	3987.51	0.0892491	11229.3	1.06973	0.0275614	1748.33	0.946811	1.00611
136	1048.7	1048.8	z1K	0.96	0.00394695	4475.72	0.0565291	8238.1	0.946339	1.0318	0.983892	0.0286072	2210.07	0.120649	2342.23	0.0756422	3665.3	0.0871746	3987.72	0.0945368	11231.7	1.04535	0.0288086	1748.21	0.955355	1.00529
136	1048.8	1048.9	z1K	0.96	0.00400158	4471.85	0.0508036	8245.65	0.938694	1.05267	0.983279	0.0286573	2209.54	0.107766	2340.58	0.0751491	3669.7	0.0893735	3984.4	0.0872045	11243.5	1.04489	0.0283917	1748.62	0.961085	1.00505
136	1048.9	1049	z1K	0.96	0.00472534	4473.73	0.0513411	8238.61	0.940668	1.0428	0.987393	0.031957	2209.83	0.114526	2341.96	0.0863438	3669.91	0.100749	3986.61	0.0776015	11229.9	1.04963	0.0301956	1748.79	0.958631	1.00503
136	1049	1049.1	z1K	0.0936	0.00440284	4473.36	0.0554287	8228.72	0.937875	1.04415	0.978078	0.0377842	2208.23	0.112098	2341.79	0.0864894	3677.41	0.10269	3985.16	0.0610422	11239	1.06526	0.0304473	1748.09	0.963589	1.00448
136	1049.1	1049.2	z1K	0.0936	0.00676597	4477.02	0.0423457	8244.21	0.930412	1.01896	0.98324	0.0276207	2209.87	0.308985	2341.88	0.097087	3672.1	0.0892748	3980.58	0.12524	11214.3	1.03432	0.0356108	1747.73	0.982551	1.0003
136	1049.2	1049.3	z1K	0.0936	0.00712675	4472.77	0.041157	8249.39	0.930766	1.01094	0.983524	0.0291465	2209.26	0.319251	2341.19	0.100315	3670.59	0.0982112	3980.46	0.134836	11212.1	1.04581	0.0359654	1747.59	0.984797	1.00081
136	1049.3	1049.4	z1K	0.0936	0.00596451	4470.78	0.0454788	8260.19	0.924987	1.01099	0.99172	0.0282516	2209.22	0.253143	2340.03	0.0917592	3665.45	0.100133	3981.34	0.158627	11206.3	1.05033	0.0360926	1747.3	0.971712	1.00039
136	1049.4	1049.5	z1K	0.0936	0.00687358	4468.09	0.0434668	8270.17	0.926239	1.01387	0.988559	0.0277915	2210.59	0.253792	2339.31	0.0931639	3668.97	0.0968851	3977.06	0.149254	11220.4	1.06381	0.0343739	1747.8	0.977933	1.00088
136	1049.5	1049.6	z1K	0.0936	0.0083738	4474.79	0.0720776	8236.34	0.930164	0.999243	0.982618	0.031589	2212	0.23484	2341.19	0.123867	3670.4	0.127532	3982.75	0.146447	11215.3	1.09441	0.0398522	1747.16	0.970676	1.00451
136	1049.6	1049.7	z1K	0.0936	0.00594013	4471.13	0.0837075	8217.84	0.936785	1.01019	0.981271	0.0394588	2210.95	0.0991576	2340.31	0.110507	3670.73	0.135107	3986.64	0.0920548	11227	1.10998	0.0403122	1746.58	0.957556	1.00834
136	1049.7	1049.8	z1K	0.0936	0.00508557	4468.42	0.0863152	8222.43	0.929399	1.02665	0.98071	0.040878	2209.91	0.0969653	2339.87	0.111742	3670.23	0.137874	3985.29	0.10485	11224.7	1.10861	0.0410323	1746.71	0.957507	1.01062
136	1049.8	1049.9	z1K	0.0936	0.00536341	4469.65	0.0811166	8228.84	0.925087	1.04958	0.984059	0.0376828	2210.31	0.110219	2340.36	0.11304	3669.15	0.133315	3984.55	0.119334	11237.8	1.0906	0.0388491	1746.76	0.960452	1.00776
136	1049.9	1050	z1K	0.0097	0.0063913	4472.06	0.0907606	8236.25	0.927812	1.11596	0.983003	0.0404104	2209.33	0.15116	2340.58	0.113217	3670.37	0.126994	3983.81	0.105505	11259.4	1.10456	0.0403433	1747.19	0.964596	1.00367
136	1050	1050.1	z1K	0.0097	0.00616418	4472.77	0.0870667	8216.76	0.922956	1.03298	0.98113	0.0536191	2208.27	0.144235	2340.97	0.118406	3674	0.129923	3981.33	0.0930756	11260	1.05268	0.0476863	1748.23	0.964671	1.00194
136	1050.1	1050.2	z1K	0.0097	0.0057865	4469.04	0.0828058	8215.73	0.925959	1.06029	0.981462	0.0566759	2207.37	0.102022	2340.32	0.103923	3679.4	0.11973	3980.16	0.0754508	11275.3	1.05096	0.0442572	1748.15	0.964332	1.00205
136	1050.2	1050.3	z1K	0.0097	0.00679936	4462.88	0.0713985	8221.14	0.941544	1.08614	0.980645	0.0569717	2208.15	0.0540052	2339.31	0.0873162	3689.63	0.114204	3980.79	0.0424791	11288.9	1.05666	0.0404595	1748.7	0.96543	1.00715
136	1050.3	1050.4	z1K	0.0097	0.00492643	4464.29	0.0675236	8219.51	0.92053	1.10837	0.980392	0.0551985	2207.77	0.0688884	2339.41	0.0909192	3684.54	0.109949	3977.97	0.0541692	11294.3	1.01149	0.0402149	1748.93	0.965052	1.00356
136	1050.4	1050.5	z1K	0.0097	0.00526071	4464.56	0.0543438	8218.54	0.922596	1.11517	0.981566	0.0594165	2207.54	0.0712277	2340.21	0.0919036	3686.26	0.108675	3977.28	0.0377529	11302.4	0.997858	0.0386625	1748.23	0.969147	1.00024
136	1050.5	1050.6	z1K	0.0097	0.00745934	4461.17	0.0470806	8224.16	0.938717	1.11089	0.981578	0.0570991	2208.4	0.0545498	2339.65	0.089702	3690.27	0.115443	3979.93	0.0301215	11298.9	1.02548	0.0400239	1748.91	0.968577	1.00568
136	1050.6	1050.7	z1K	0.0097	0.0086111	4464.44	0.0425394	8219.96	0.957796	1.08372		0.0527261	2209.01	0.0460676	2339.62	0.0822524	3690.8	0.1129	3983.07	0.0217402	11293.9	1.05399	0.0421251	1748.57	0.966328	1.00806
136	1050.7	1050.8	z1K	0.0097	0.00731173	4462.82	0.0464485	8225.43	0.95251	1.07319	0.973981	0.0483723	2208.95	0.0446908	2338.61	0.0744041	3690.31	0.103657	3981.67	0.0275582	11298.2	1.05096	0.0406909	1749.33	0.964212	1.01023
136	1050.8	1050.9	z1K	0.0097	0.00613812	4463.74	0.0841892	8222.36	0.932491	1.10521	0.97377	0.0592652	2208.94	0.0686116	2339.15	0.0836933	3685.93	0.101213	3976.51	0.0620952	11298.8	0.998744	0.0307026	1749.26	0.97397	1.00795
136	1050.9	1051	z1K	0.0097	0.00732579	4459.65	0.0868362	8221	0.926648	1.13979	0.97669	0.0594289	2209	0.0520465	2335.31	0.0775094	3696.42	0.094154	3964.54	0.0749364	11280.3	1.00478	0.0261889	1750.2	0.975463	1.00698
136	1051	1051.1	z1K	0.0097	0.00900102	4460.1	0.0743244	8220.9	0.948539	1.14241	0.981062	0.0599698	2209.65	0.04135	2335.27	0.070362	3705.32	0.0967795	3962.11	0.0479376	11289.3	1.01446	0.0267969	1749.05	0.976433	1.00915
136	1051.1	1051.2	z1K	0.0097	0.00766939	4459.77	0.0714292	8216.49	0.937035	1.16367		0.0649795	2208.76	0.0470602	2335.85	0.0715703	3703.49	0.094397	3962.09	0.0478559	11290.7	0.978208	0.0264855	1749.39	0.979275	1.00738
136	1051.2	1051.3	z1K	0.0097	0.00685709	4460.94	0.0771338	8218.06	0.923232	1.19588	0.979455	0.0751387	2208.25	0.0562904	2336.26	0.0741524	3700.61	0.0898268	3963.44	0.054861	11293.6	0.943024	0.0230954	1749.66	0.986575	1.00353
136	1051.3	1051.4	z1K	0.0097	0.0072537	4460.8	0.0857038	8219.42	0.923411	1.19854	0.979603	0.0771077	2207.76	0.0592781	2336.32	0.0807131	3697.77	0.0986571	3963.16	0.0614737	11279	0.962078	0.0282997	1749.06	0.984091	1.00543
136	1051.4	1051.5	z1K	0.0097	0.00810363	4464.78	0.0726588	8230.84	0.954903	1.1425	0.976125	0.0669678	2209.08	0.0475346	2338.61	0.0648505	3701.65	0.0868152	3973.6	0.0349792	11304.1	0.987386	0.0239445	1749.82	0.98156	1.00481
136	1051.5	1051.6	z1K	0.0097	0.0143172	4468.64	0.064697	8333.37	0.976274	1.11424		0.0689158	2209.83	0.0797429	2337.43	0.0757957	3685.03	0.0909635	3976.89	0.0554082	11282.5	1.10823	0.0298719	1749.57	0.981699	1.00914
136	1051.6	1051.7	z1K	0.0097	0.0133356	4455.6	0.0746103	8426.04	0.933242	1.13344	0.971663	0.0807086	2209.58	0.0862744	2335.05	0.113609	3686.15	0.116421	3965.41	0.119432	11270.7	1.23745	0.0333054	1748.83	0.990178	1.02338
136	1051.7	1051.8	z1K	0.0097	0.0409489	4453.8	0.139783	8403.84	0.930998	1.13261	0.980644	0.0729111	2210.16	0.0865333	2334.73	0.270758	3681.27	0.265481	3965.99	0.237755	11263.2	1.31098	0.0440819	1747.95	0.981827	1.02833
136	1051.8	1051.9	z1K	0.0097	0.0189819	4454.27	0.149917	8239.24	0.938382	1.0904	0.976761	0.0619696	2209.51	0.0550928	2333.76	0.179977	3692.56	0.212637	3962.97	0.166662	11265.7	1.17056	0.0414434	1747.28	0.974892	1.02812
136	1051.9	1052	z1K	0.0097	0.0152741	4454.88	0.120237	8270.74	0.937913	1.10048	0.978657	0.0535819	2209.61	0.0500307	2333.24	0.139139	3688.79	0.161577	3962.32	0.160832	11261.9	1.21504	0.0388827	1747.54	0.97166	1.02417
136	1052	1052.1	z1K	0.0097	0.0150196	4455.23	0.118968	8307.61	0.937562	1.11834	1.00598	0.0596754	2209.38	0.0507025	2332.76	0.130806	3690.58	0.151147	3962.53	0.134557	11265.3	1.22078	0.0388708	1747.63	0.976409	1.02023
136	1052.1	1052.2	z1K	0.0097	0.013922	4456.13	0.0854166	8317.01	0.956323	1.15258	0.982438	0.0399463	2210.37	0.0327215	2330.96	0.101037	3694.29	0.127972	3962.33	0.121689	11269.2	1.15953	0.0359055	1748.51	0.973926	1.02389
136	1052.2	1052.3	z1K	0.0059	0.0105508	4457.39	0.0774859	8304.23	0.949808	1.15368	0.982028	0.0354928	2209	0.0332956	2331.84	0.0989882	3693.71	0.126735	3963.2	0.120255	11269.1	1.10343	0.0345969	1749.06	0.973719	1.02081
136	1052.3	1052.4	z1T	0.0059	0.00844869	4461.59	0.0704789	8277.35	0.96758	1.14664	0.984461	0.0302472	2208.32	0.0269375	2329.58	0.0863296	3666.73	0.0982294	3962.61	0.0797221	11288.4	1.02992	0.0326189	1749.19	0.971039	1.02544
136	1052.4	1052.5	z1T	0.0059	0.0099316	4454.84	0.0825844	8372.91	0.932329	1.14121	0.980661	0.0293639	2210.56	0.0395411	2325.99	0.104805	3681.05	0.131525	3958.14	0.195316	11251.5	1.16221	0.0364292	1748.47	0.965878	1.02577
136	1052.5	1052.6	z1T	0.0059	0.00978629	4455.16	0.0772827	8324.65	0.926305	1.12678	0.974407	0.0299844	2210.33	0.0362515	2326.9	0.111556	3685.17	0.142441	3957.28	0.195919	11249.6	1.16219	0.0360668	1748.32	0.966921	1.02375
136	1052.6	1052.7	z1T	0.0059	0.0093195	4455.35	0.0810391	8302.62	0.932891	1.11515	0.977562	0.0286995	2210.6	0.0346877	2325.79	0.1101	3685.88	0.141899	3957.88	0.177596	11253.8	1.1345	0.036933	1748.03	0.966114	1.02342
136	1052.7	1052.8	z1T	0.33	0.011444	4454.09	0.093683	8356.95	0.928904	1.11077	0.978424	0.028219	2211.76	0.0382622	2325.19	0.124029	3684.81	0.155466	3957.33	0.215425	11242	1.18617	0.0391486	1747.84	0.96265	1.02363
136	1052.8	1052.9	z1T	0.33	0.00964682	4461.41	0.055273	8305.83	0.961694	1.13325	0.976736	0.0272344	2208.31	0.0437363	2329.38	0.0870167	3649.2	0.0986783	3960.55	0.0921991	11248.6	1.07475	0.0406014	1749.67	0.961042	1.02924
136	1052.9	1053	z1T	0.33	0.0065739	4460.43	0.0370611	8308.62	0.974407	1.144	0.97943	0.0258294	2207.83	0.0325719	2328.6	0.0781648	3627.93	0.0723403	3960.35	0.0532609	11250.9	1.02666	0.0379731	1750.24	0.962596	1.03221
136	1053	1053.1	z1T	0.33	0.00629494	4457.93	0.026504	8274.94	0.947289	1.09932	0.978213	0.026973	2206.48	0.036888	2325.63	0.0859989	3633.48	0.092944	3958	0.104981	11227.2	1.02968	0.0405327	1750.12	0.956328	1.03177
136	1053.1	1053.2	z1T	0.33	0.00711053	4463.22	0.0360701	8332.5	0.97558	1.14339	0.976498	0.0268105	2206.06	0.0315254	2327.11	0.0811754	3611.65	0.0739889	3961.3	0.0563418	11228.1	1.04969	0.0399608	1750.36	0.965604	1.03499
136	1053.2	1053.3	z1Cs	0.143	0.0106295	4464.57	0.123304	8372.36	0.992736	1.68641	0.973693	0.059617	2206.89	0.0360286	2326.6	0.067696	3678.48	0.0492243	3960.39	0.0491744	11246.9	1.01348	0.0345981	1749.89	0.963098	1.02922
136	1053.3	1053.4	z1Cs	0.143	0.0166275	4460.82	0.338792	8240.76	0.984842	3.27557	0.9736	0.179373	2209.55	0.0661398	2323.29	0.0781618	3673.48	0.0768048	3963.92	0.110206	11258.9	0.897923	0.0375767	1748.04	0.981334	1.02754
136	1053.4	1053.5	z1Cs	0.143	0.0204598	4461.33	0.383842	8239.8	0.989037	2.86966	0.973398	0.215008	2209.74	0.0866074	2324.26	0.0948223	3667.04	0.0887863	3963.62	0.114366	11258.6	0.930691	0.0337221	1747.39	1.00141	1.02661
136	1053.5	1053.6	z1Cs	0.143	0.0234998	4470.51	0.397674	8219.58	1.02206	2.23446	0.973929	0.226633	2208.55	0.0561024	2326.67	0.0790861	3682.64	0.0864199	3968.45	0.0469085	11273.1	0.970753	0.0254556	1747.31	0.994448	1.02113
136	1053.6	1053.7	z1Cs	0.0281	0.033498	4469.4	0.389564	8229.77	1.04358	2.51054	0.974137	0.312021	2208.96	0.0704589	2323.57	0.104537	3671.42	0.10052	3970.23	0.0502798	11280.7	0.982244	0.0288709	1747.23	1.01295	1.02614
136	1053.7	1053.8	z1Cs	0.0281	0.0387123	4473.99	0.431822	8247	1.08817	3.28593	0.974792	0.362482	2208.28	0.0648423	2326.27	0.0748691	3663.31	0.06858	3975.81	0.0199729	11296.9	0.985743	0.0309159	1746.88	1.00569	1.02501
136	1053.8	1053.9	z1Cs	0.0281	0.042057	4475.31	0.417294	8245.93	1.09727	3.57298	0.974041	0.360041	2208.33	0.0566519	2328.44	0.0494957	3645.98	0.0359136	3981.34	0.0133947	11278.1	0.977244	0.037138	1746.24	0.99246	1.02179
136	1053.9	1054	z1Cs	0.0281	0.0430085	4475	0.376622	8249.35	1.09523	3.5371	0.97508	0.33872	2208.5	0.0496498	2328.5	0.0471617	3647.36	0.0346484	3980.84	0.0129988	11275.6	0.992439	0.0419354	1746.67	0.989685	1.02361
136	1054	1054.1	z1Cs	0.0281	0.0414649	4475.6	0.402932	8271.39	1.0946	3.88759	0.974738	0.294055	2208.61	0.0394493	2327.03	0.0447099	3648.73	0.0334592	3981.01	0.0124733	11283.7	1.03996	0.0414455	1746.89	0.984387	1.02521
136	1054.1	1054.2	z1Cs	0.0318	0.048746	4476.3	0.432909	8255.21	1.09575	4.32719	0.974172	0.305172	2208.71	0.038814	2326.03	0.0456612	3642.45	0.0300511	3982.97	0.0139669	11286.6	0.999903	0.0429113	1746.66	0.981883	1.02331
136	1054.2	1054.3	z1Cs	0.0318	0.0536578	4475.64	0.446576	8265.32	1.09143	4.03835	0.97269	0.293615	2208.94	0.0376077	2326.14	0.0652871	3653.43	0.0539529	3980.5	0.0218826	11277.8	1.05098	0.0433707	1746.67	0.982101	1.02008
136	1054.3	1054.4	z1Cs	0.0318	0.0423476	4467.64	0.483507	8283.02	1.03269	3.4251	0.972539	0.22051	2209.36	0.0610296	2326.3	0.124128	3672.58	0.122124	3967.63	0.107912	11269.5	1.07237	0.0327362	1746.71	0.998939	1.02429
136	1054.4	1054.5	z1Cs	0.0318	0.0729065	4474.55	0.565347	8245.61	1.05696	4.26747	0.972745	0.236419	2208.92	0.052492	2329.71	0.114626	3662.4	0.104842	3974.61	0.0805177	11276.2	0.985236	0.0346085	1746.74	0.983653	1.01885
136	1054.5	1054.6	z1Cs	0.0318	0.0410271	4476.85	0.420376	8224.87	1.05687	3.65116	0.973313	0.260303	2208.39	0.0445438	2331.52	0.039538	3634.68	0.0287798	3980.32	0.0173397	11283.3	0.925996	0.0461933	1746.67	0.968642	1.02555
136	1054.6	1054.7	z1Cs	0.0318	0.0244566	4467.1	0.391252	8231.28	1.01136	2.75101	0.973818	0.242629	2208.95	0.081229	2327.79	0.0813906	3665.99	0.0769577	3967.01	0.0784836	11277.6	0.939701	0.0354561	1747.4	0.996857	1.02663
136	1054.7	1054.8	z1Cs	0.0318	0.0258817	4469.23	0.416994	8236.91	1.02613	2.89168	0.973824	0.238907	2208.57	0.0740912	2330.29	0.0747671	3669.36	0.0748191	3967.66	0.062786	11279.5	0.955805	0.0368217	1747.25	0.990157	1.02521
136	1054.8	1054.9	z1Cs	0.0318	0.0313225	4475.3	0.466611	8243.42	1.05606	3.8095	0.972951	0.251274	2208.04	0.0636939	2336.17	0.051067	3665.33	0.0484329	3974.71	0.0227781	11286.5	0.955558	0.0380513	1747.02	0.97871	1.02516
136	1054.9	1055	z1Cs	0.0318	0.0413492	4476.58	0.448756	8246.86	1.06677	4.63627	0.974664	0.243761	2208.56	0.0583822	2335.62	0.0515132	3651.84	0.0382252	3979.47	0.0204597	11283.1	0.979535	0.0467965	1746.46	0.972023	1.02842
136	1055	1055.1	z1Cs	0.0318	0.0392385	4475.06	0.403293	8260.02	1.05918	4.00621	0.974715	0.214333	2208.38	0.0493184	2335.57	0.0505673	3657.36	0.0384909	3978.44	0.0293458	11264.1	1.02965	0.049847	1747.13	0.967127	1.05227
136	1055.1	1055.2	z1Cs	0.0318	0.0240091	4464.01	0.406875	8258.1	0.998137	2.90796	0.974579	0.210396	2209.11	0.0810009	2327.35	0.0938623	3672.36	0.0921123	3964.18	0.101466	11278.2	0.955702	0.0373707	1747.19	0.990195	1.03621
136	1055.2	1055.3	z1Cs	0.0318	0.028379	4469.57	0.413529	8253.34	1.02211	3.55864	0.975635	0.218424	2208.8	0.0662855	2330.17	0.0749902	3667.45	0.0743512	3967.5	0.0710339	11287	0.934567	0.0399624	1747.06	0.98076	1.0302
136	1055.3	1055.4	z1Cs	0.0318	0.0264498	4470.48	0.424894	8251.12	1.03	3.69094	0.968492	0.212734	2208.5	0.0609732	2330.91	0.068903	3671.87	0.0672918	3969.29	0.0590849	11294.8	0.935657	0.0372909	1746.96	0.980408	1.02277
136	1055.4	1055.5	z1Cs	0.0318	0.0288871	4472.22	0.441057	8238.54	1.03461	3.8471	0.974636	0.248589	2208.43	0.0671765	2329.69	0.0685403	3666.67	0.0650755	3971.36	0.0477637	11304.8	0.897443	0.0361855	1746.95	0.985938	1.0228
136	1055.5	1055.6	z1Cs	0.0318
* Z1k = Zechtein Kalkstein; Z1T = Zechstein Copper Shale; Z1Cs = Zechstein Conglomerate; Z1Csr = Zechstein Conglomerate with Rote Fäule alteration
